# Supplementary material
Source: publisher site journal article supplement (https://www.dovepress.com/article/238358)
Supplement: Supplementary file 1 [file get_supplementary_file.php]

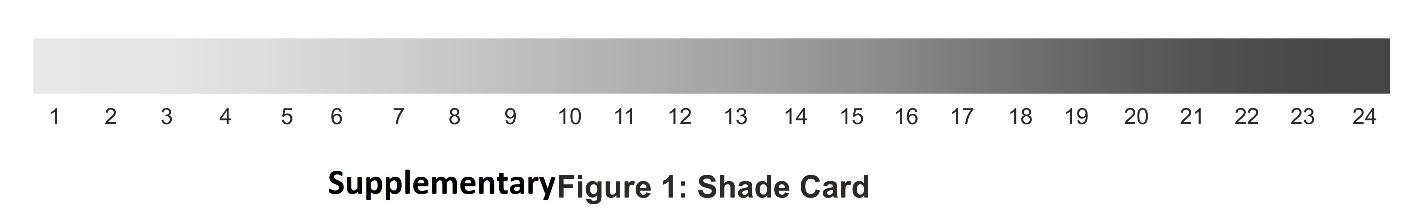


**Supplementary Table 1: Image-based comparative analysis by Dermatologist**

| **S.No.** | **Questions** | **Baseline Vs. Week4** | | **Baseline Vs. Week8** | |
| --- | --- | --- | --- | --- | --- |
| **No Improvement (%)** | **Improvement (%)** | **No Improvement (%)** | **Improvement (%)** |
| 1 | In which image the skin looks more moisturized. | 3 | 97 | 0 | 100 |
| 2 | In which image the skin looks more even-toned. | 3 | 97 | 8 | 92 |
| 3 | In which image the overall skin quality is visually better. | 0 | 100 | 5 | 95 |
| 4 | In which image the skin looks lighter/fairer/brighter. | 3 | 97 | 5 | 95 |
| 5 | In which image the skin has lesser fine line &wrinkles. | 5 | 95 | 5 | 95 |
| 6 | In which image the skin looks firm. | 0 | 100 | 3 | 97 |
| 7 | In which image the skin looks lesser depth (nasolabial fold) | 0 | 100 | 5 | 95 |

**Supplementary Table 2: Self-Assessment**

| **1. Leaves your skin moisturized** | | | |
| --- | --- | --- | --- |
| **Time point** | **Disagree** | **Indecisive** | **Agree** |
| Visit 2 (Week 2) | 7.89% | 0.00% | 92.11% |
| Visit 3 (Week 4) | 0.00% | 0.00% | 100.00% |
| Visit 4 (Week 8) | 0.00% | 0.00% | 100.00% |
| **2. Makes your skin brighter** | | | |
| **Time point** | **Disagree** | **Indecisive** | **Agree** |
| Visit 2 (Week 2) | 0.00% | 7.89% | 92.11% |
| Visit 3 (Week 4) | 0.00% | 0.00% | 100.00% |
| Visit 4 (Week 8) | 0.00% | 0.00% | 100.00% |
| **3. Makes your skin look even tone** | | | |
| **Time point** | **Disagree** | **Indecisive** | **Agree** |
| Visit 2 (Week 2) | 7.89% | 13.16% | 78.95% |
| Visit 3 (Week 4) | 0.00% | 0.00% | 100.00% |
| Visit 4 (Week 8) | 0.00% | 0.00% | 100.00% |
| **4. Makes your skin look firmer (tight)** | | | |
| **Time point** | **Disagree** | **Indecisive** | **Agree** |
| Visit 2 (Week 2) | 5.26% | 18.42% | 76.32% |
| Visit 3 (Week 4) | 0.00% | 0.00% | 100.00% |
| Visit 4 (Week 8) | 0.00% | 0.00% | 100.00% |
| **5. Makes your skin look younger** | | | |
| **Time point** | **Disagree** | **Indecisive** | **Agree** |
| Visit 2 (Week 2) | 2.63% | 36.84% | 60.53% |
| Visit 3 (Week 4) | 0.00% | 0.00% | 100.00% |
| Visit 4 (Week 8) | 0.00% | 0.00% | 100.00% |
